# Supplementary material for: Simultaneous negative thermal quenching luminescence of upconversion and downshifting processes in Al2(WO4)3:Yb/Er phosphors with low thermal expansion
Source: Royal Society of Chemistry journal article supplement (doi:10.1039/d4tc02102a), 2024-01-01
Supplement: d4tc02102a1.pdf [file d4tc02102a1.pdf]

## Supplementary information

### **Simultaneous negative thermal quenching luminescence of upconversion and downshifting processes in $\text{Al}_2(\text{WO}_4)_3:\text{Yb}/\text{Er}$ Phosphors with low thermal expansion**

Haokun Yan<sup>a</sup>, Renfu Li<sup>a</sup>, Liuzhen Feng<sup>a</sup>, Yiqi Yu<sup>a</sup>, Guoliang Gong<sup>a</sup>, Haiping Huang<sup>a</sup>, He-Rui Wen<sup>a</sup> and  
Jinsheng Liao<sup>\*ab</sup>

---

<sup>a</sup>School of Chemistry and Chemical Engineering/Jiangxi Provincial Key Laboratory of Functional Molecular  
Materials Chemistry, Jiangxi University of Science and Technology, Ganzhou, Jiangxi, 341000, P.R. China.

E-mail address: [jsliao1209@126.com](mailto:jsliao1209@126.com) (J. S. Liao)

<sup>b</sup>National Rare Earth Functional Material Innovation Center, Ganzhou 341000, P.R. China

Table S1 AWO:20%Yb<sup>3+</sup>/2%Er<sup>3+</sup> phosphor cell parameters and refinement parameters at different temperatures and AWO host cell parameters at 293 K.

| T (K)                                                   | 298                 | 323      | 348      | 373      | 398      | 423      |
|---------------------------------------------------------|---------------------|----------|----------|----------|----------|----------|
| Crystal system                                          | Orthorhombic        |          |          |          |          |          |
| Space group                                             | <i>Pnca</i> (No.60) |          |          |          |          |          |
| Lattice parameters (Å)                                  | <i>a</i> =9.1555    | 9.1554   | 9.1551   | 9.1550   | 9.1550   | 9.1547   |
|                                                         | <i>b</i> =12.6384   | 12.6398  | 12.6421  | 12.6443  | 12.6464  | 12.6479  |
|                                                         | <i>c</i> =9.0718    | 9.0719   | 9.0719   | 9.0724   | 9.0726   | 9.0726   |
| V (Å <sup>3</sup> )                                     | 1049.725            | 1049.815 | 1049.980 | 1050.207 | 1050.403 | 1050.491 |
| <i>R</i> <sub>wp</sub> (%)                              | 4.25                | 4.28     | 4.18     | 4.25     | 4.54     | 4.61     |
| <i>R</i> <sub>p</sub> (%)                               | 3.30                | 3.34     | 3.25     | 3.30     | 3.55     | 3.57     |
| $\chi^2$                                                | 2.20                | 2.15     | 2.09     | 2.45     | 2.53     | 2.62     |
| T (K)                                                   | 448                 | 473      | 498      | 523      | 548      | 573      |
| Crystal system                                          | Orthorhombic        |          |          |          |          |          |
| Space group                                             | <i>Pnca</i> (No.60) |          |          |          |          |          |
| Lattice parameters (Å)                                  | 9.1548              | 9.1546   | 9.1545   | 9.1542   | 9.1540   | 9.1364   |
|                                                         | 12.6497             | 12.6516  | 12.6534  | 12.6549  | 12.6570  | 12.5913  |
|                                                         | 9.0728              | 9.0729   | 9.0731   | 9.0732   | 9.0732   | 9.0560   |
| V (Å <sup>3</sup> )                                     | 1050.682            | 1050.831 | 1050.990 | 1051.087 | 1051.245 | 1051.589 |
| <i>R</i> <sub>wp</sub> (%)                              | 4.42                | 4.45     | 4.14     | 4.44     | 4.47     | 4.48     |
| <i>R</i> <sub>p</sub> (%)                               | 3.43                | 3.47     | 3.44     | 3.45     | 3.45     | 3.39     |
| $\chi^2$                                                | 2.48                | 2.58     | 2.58     | 2.70     | 2.73     | 3.09     |
| Al <sub>2</sub> (WO <sub>4</sub> ) <sub>3</sub> at 293K |                     |          |          |          |          |          |
| Crystal system                                          | Orthorhombic        |          |          |          |          |          |
| Space group                                             | <i>Pnca</i> (No.60) |          |          |          |          |          |
| Lattice parameters (Å)                                  | <i>a</i> =9.1364    |          |          |          |          |          |
|                                                         | <i>b</i> =12.5913   |          |          |          |          |          |
|                                                         | <i>c</i> =9.0560    |          |          |          |          |          |
| V (Å <sup>3</sup> )                                     | 1041.795            |          |          |          |          |          |

Table S2 Temperature-dependent lifetime of  $\text{Yb}^{3+}$  ( $\tau_{\text{Yb}}$ ) in AWO: 20% $\text{Yb}^{3+}$  and temperature-dependent lifetime of  $\text{Yb}^{3+}$  and  $\text{Er}^{3+}$  ( $\tau_{\text{Er}}$ ) in AWO:20% $\text{Yb}^{3+}$ /2% $\text{Er}^{3+}$

| T (K)                                                                                                        | 298   | 323   | 348   | 373   | 398   | 423   |
|--------------------------------------------------------------------------------------------------------------|-------|-------|-------|-------|-------|-------|
| $\tau_{\text{Yb}}$ of AWO: 20% $\text{Yb}^{3+}$ ( $\mu\text{s}$ )                                            | 423.7 | 422.7 | 330.7 | 261.2 | 262.0 | 472.3 |
| $\tau_{\text{Yb}}$ of AWO:20% $\text{Yb}^{3+}$ /2% $\text{Er}^{3+}$ ( $\mu\text{s}$ )                        | 503.6 | 492.7 | 483.9 | 470.2 | 462.1 | 480.1 |
| $\tau_{\text{Er}}$ of $^4\text{H}_{11/2}$ of AWO:20% $\text{Yb}^{3+}$ /2% $\text{Er}^{3+}$ ( $\mu\text{s}$ ) | 107.6 | 111.3 | 113.6 | 113.6 | 101.6 | 111.8 |
| $\tau_{\text{Er}}$ of $^4\text{I}_{13/2}$ of AWO:20% $\text{Yb}^{3+}$ /2% $\text{Er}^{3+}$ (ms)              | 10.55 | 10.39 | 10.39 | 10.14 | 9.640 | 9.661 |
| T (K)                                                                                                        | 448   | 473   | 498   | 523   | 548   | 573   |
| $\tau_{\text{Yb}}$ of AWO: 20% $\text{Yb}^{3+}$ ( $\mu\text{s}$ )                                            | 614.7 | 804.2 | 896.7 | 887.3 | 842.2 | 820.5 |
| $\tau_{\text{Yb}}$ of AWO:20% $\text{Yb}^{3+}$ /2% $\text{Er}^{3+}$ ( $\mu\text{s}$ )                        | 486.8 | 471.8 | 467.5 | 471.3 | 462.1 | 456.6 |
| $\tau_{\text{Er}}$ of $^4\text{H}_{11/2}$ of AWO:20% $\text{Yb}^{3+}$ /2% $\text{Er}^{3+}$ ( $\mu\text{s}$ ) | 133.0 | 139.2 | 157.5 | 166.4 | 168.4 | 184.6 |
| $\tau_{\text{Er}}$ of $^4\text{I}_{13/2}$ of AWO:20% $\text{Yb}^{3+}$ /2% $\text{Er}^{3+}$ (ms)              | 10.29 | 10.24 | 9.950 | 9.494 | 8.900 | 8.244 |

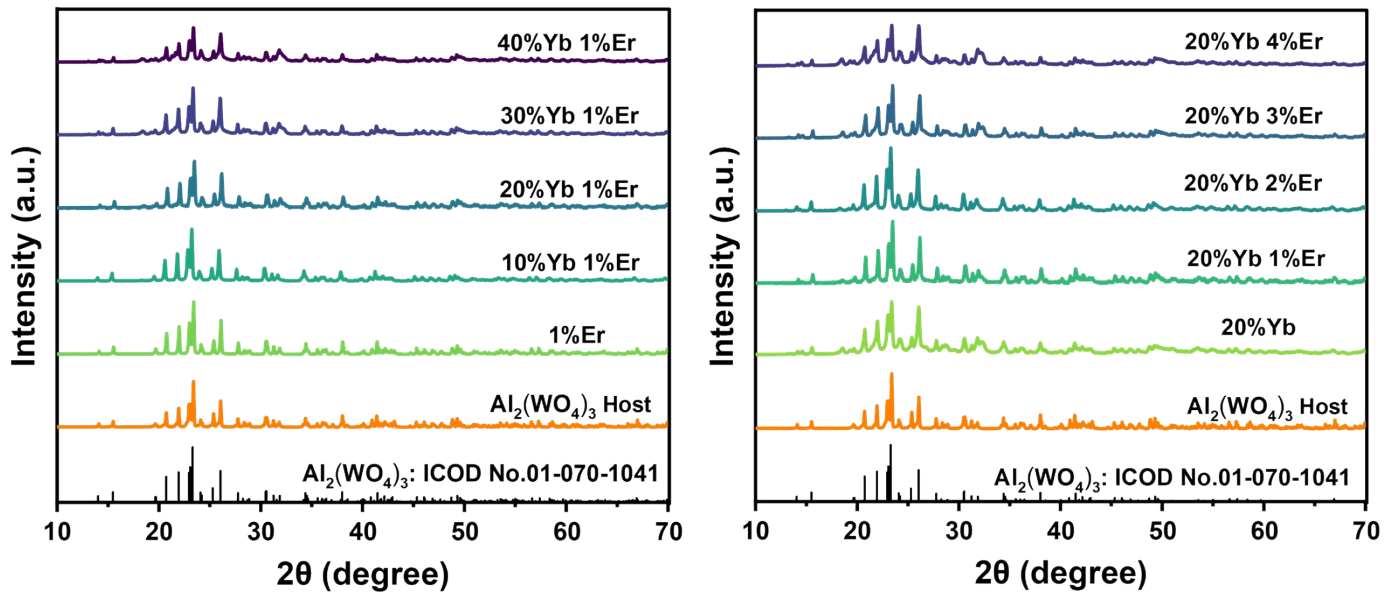

**Fig. S1** XRD patterns of AWO:xYb/yEr phosphors with different Yb<sup>3+</sup>/Er<sup>3+</sup> concentrations at room temperature.

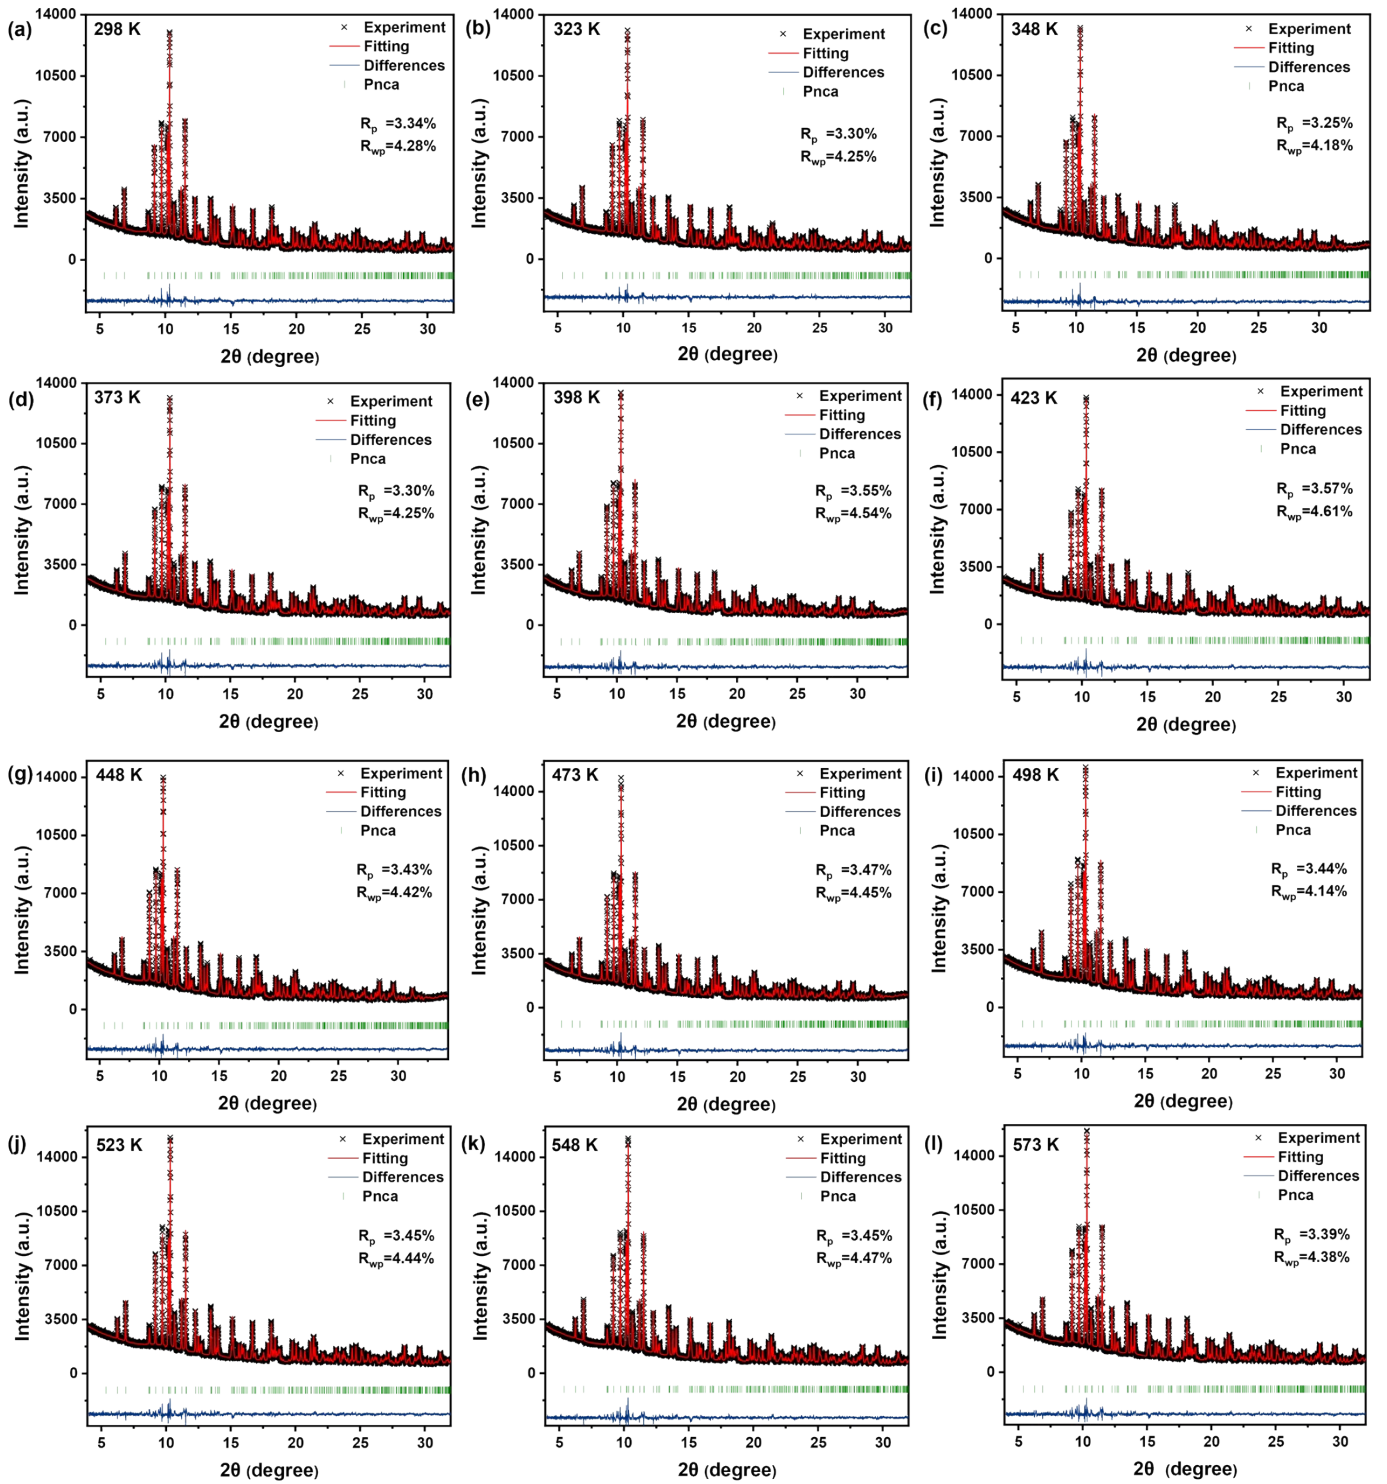

**Fig. S2** The Rietveld refinement of the SXR D patterns of the AWO:20%Yb/2%Er phosphor at different temperatures.

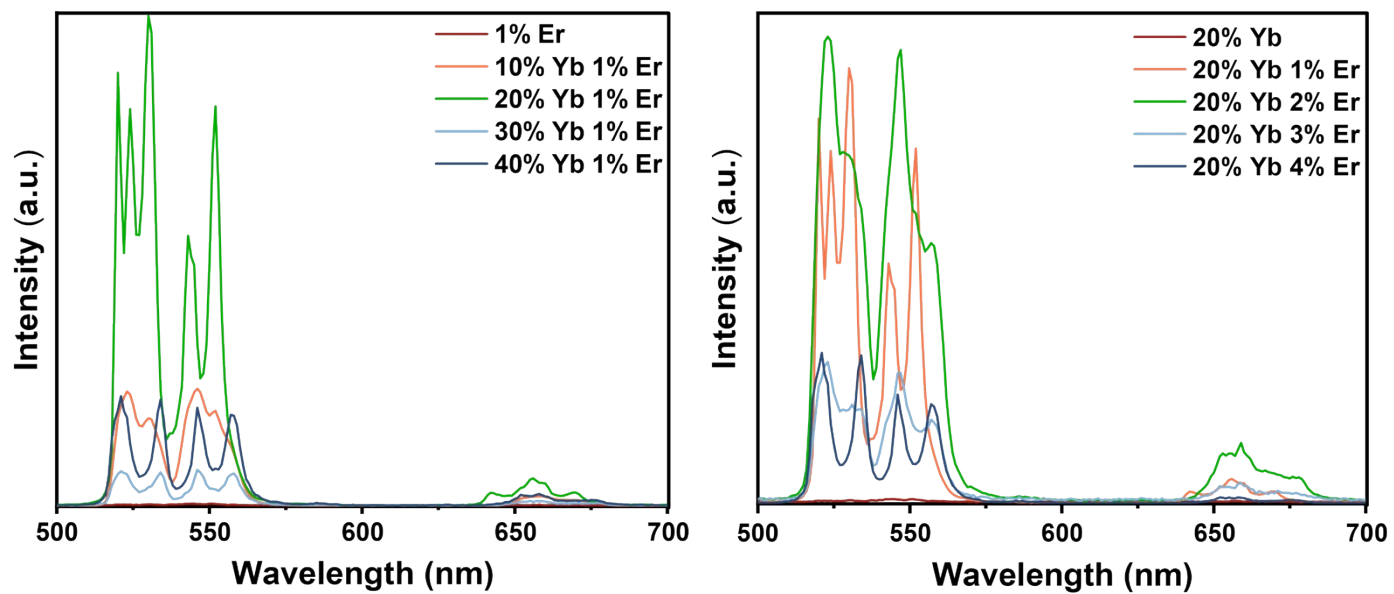

**Fig. S3** Room temperature UC spectra of varying AWO: xYb/yEr phosphors under 980 nm laser excitation.

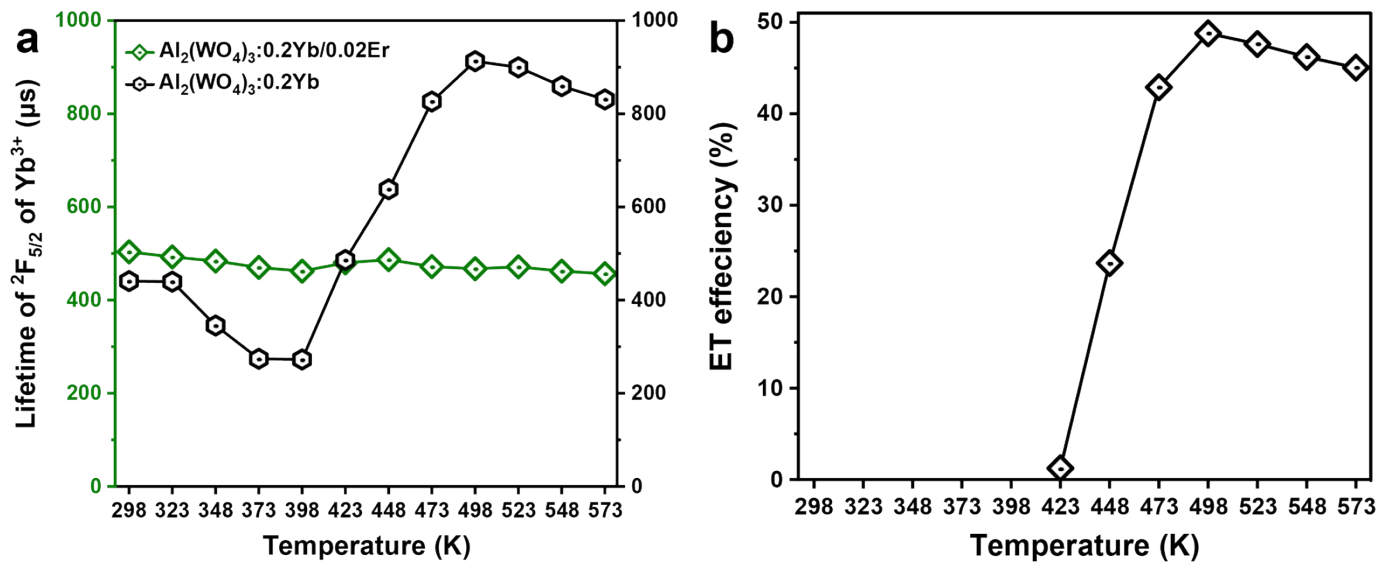

**Fig. S4** (a) Temperature-related average luminescence lifetime of <sup>2</sup>F<sub>5/2</sub> excited state of Yb<sup>3+</sup> in Yb<sup>3+</sup>-doped and Yb<sup>3+</sup>/Er<sup>3+</sup>-codoped Al<sub>2</sub>(WO<sub>4</sub>)<sub>3</sub> phosphors. (b) Temperature-dependent energy transfer efficiency of Yb<sup>3+</sup> to Er<sup>3+</sup>.

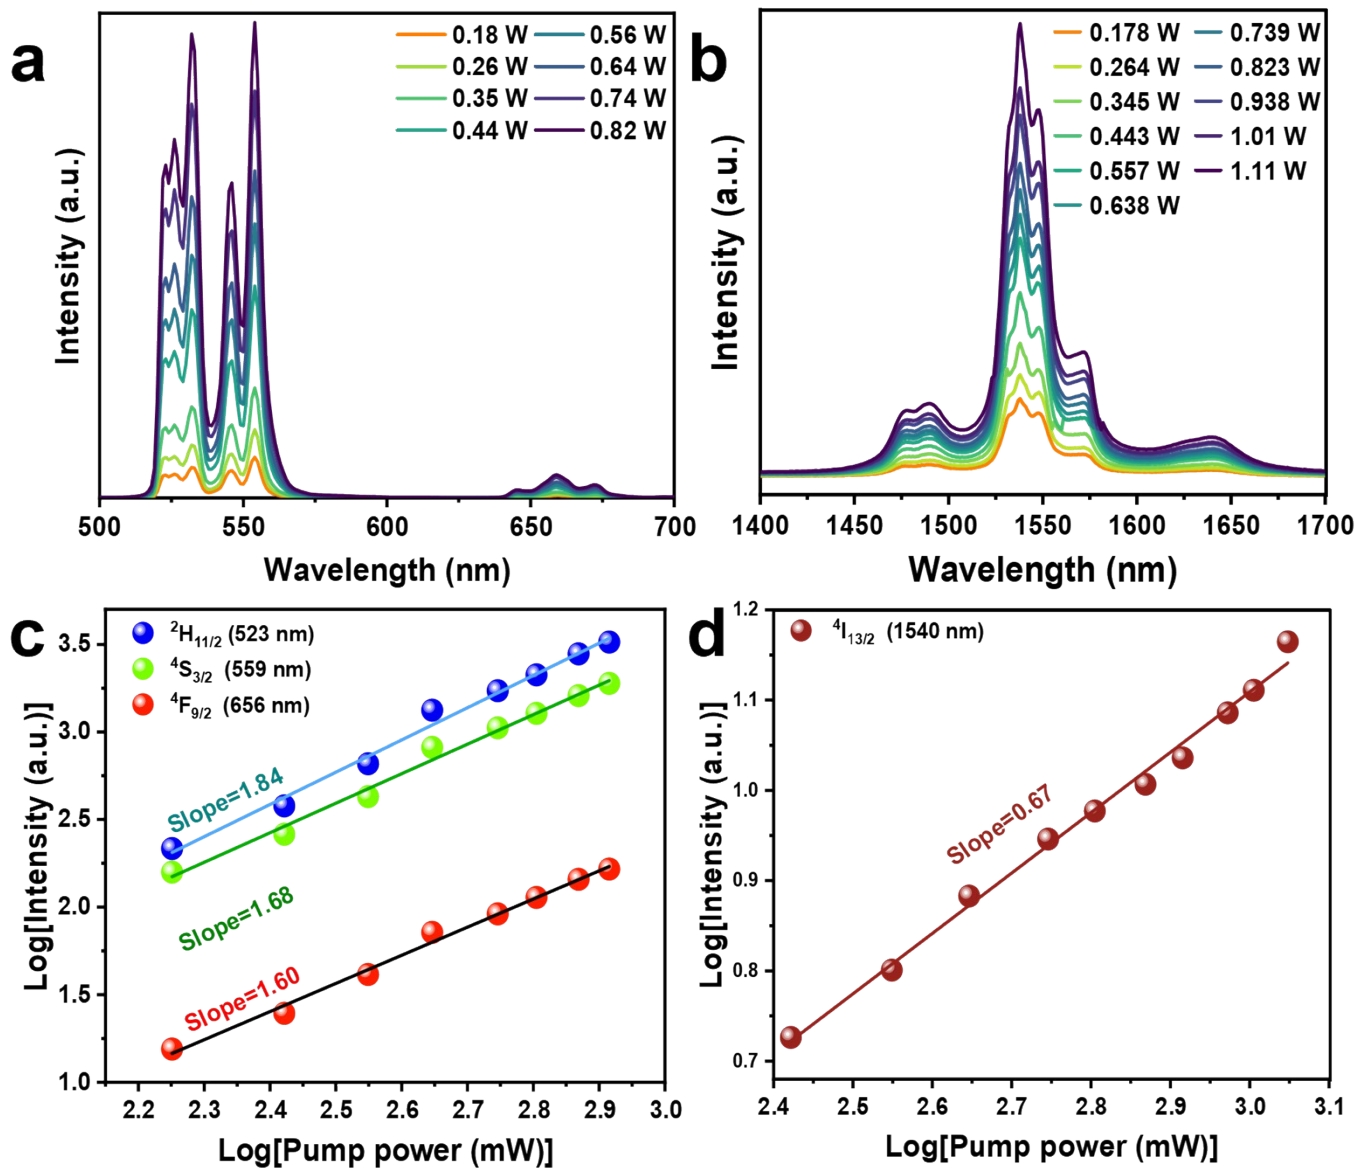

**Fig. S5** The power-dependent UC (a) and DS (b) spectra and Log-Log plots of the luminescence intensity against the excitation power of UC (c) and DS (d) emission in the AWO:20%Yb/2%Er phosphors product under 980 nm laser excitation.
